# Supplementary material
Source: publisher site journal article supplement (https://www.kjim.org/upload/media/kjim-2021-475-suppl5.pdf)
Supplement: Supplementary file 1 [file kjim-2021-475-suppl5.pdf]

**Supplementary Table 5. Treatments received (patient reported)**

| Variable                                                 | MF (n = 39) | PV (n = 25) | ET (n = 41) | All (n = 105) | p value  |
|----------------------------------------------------------|-------------|-------------|-------------|---------------|----------|
| Treatments ever received                                 |             |             |             |               |          |
| Aspirin                                                  | 17 (43.59)  | 21 (84.00)  | 34 (82.93)  | 72 (68.57)    | 0.0001   |
| Antihistamines                                           | 6 (15.38)   | 1 (4.00)    | 4 (9.76)    | 11 (10.48)    | 0.3955   |
| Bone marrow transplant or stem cell transplant           | 9 (23.08)   | 0           | 1 (2.44)    | 10 (9.52)     | 0.0010   |
| Phlebotomy                                               | 3 (7.69)    | 23 (92.00)  | 2 (4.88)    | 28 (26.67)    | < 0.0001 |
| Removal of spleen                                        | 4 (10.26)   | 0           | 2 (4.88)    | 6 (5.71)      | 0.1902   |
| Antidepressants                                          | 7 (17.95)   | 0           | 1 (2.44)    | 8 (7.62)      | 0.0121   |
| Anabolic steroids                                        | 8 (20.51)   | 0           | 2 (4.88)    | 10 (9.52)     | 0.0124   |
| Corticosteroids                                          | 11 (28.21)  | 0           | 1 (2.44)    | 12 (11.43)    | 0.0002   |
| Hydroxyurea                                              | 19 (48.72)  | 20 (80.00)  | 33 (80.49)  | 72 (68.57)    | 0.0034   |
| Ruxolitinib                                              | 25 (64.10)  | 0           | 2 (4.88)    | 27 (25.71)    | < 0.0001 |
| Other JAK inhibitors                                     | 1 (2.56)    | 0           | 0           | 1 (0.95)      | 0.6095   |
| Anti-coagulants/blood thinners (e.g., heparin, warfarin) | 5 (12.82)   | 2 (8.00)    | 4 (9.76)    | 11 (10.48)    | 0.8489   |
| Interferon (e.g., IFN- $\alpha$ )                        | 0           | 0           | 1 (2.44)    | 1 (0.95)      | 1.0000   |
| Anagrelide                                               | 4 (10.26)   | 6 (24.00)   | 13 (31.71)  | 23 (21.90)    | 0.0652   |
| Busulfan                                                 | 2 (5.13)    | 0           | 0           | 2 (1.90)      | 0.1907   |
| Transfusion                                              | 20 (51.28)  | 1 (4.00)    | 3 (7.32)    | 24 (22.86)    | < 0.0001 |
| Radiation therapy                                        | 3 (7.69)    | 0           | 1 (2.44)    | 4 (3.81)      | 0.3594   |
| Investigational drug in the context of a clinical trial  | 2 (5.13)    | 0           | 1 (2.44)    | 3 (2.86)      | 0.6162   |
| Androgens (e.g. danazol)                                 | 3 (7.69)    | 0           | 2 (4.88)    | 5 (4.76)      | 0.3625   |
| Iron replacement therapies                               | 11 (28.21)  | 0           | 4 (9.76)    | 15 (14.29)    | 0.0040   |
| Psychological therapy                                    | 10 (25.64)  | 0           | 8 (19.51)   | 18 (17.14)    | 0.0258   |
| None of the above                                        | 2 (5.13)    | 0           | 1 (2.44)    | 3 (2.86)      | 0.6162   |

Values are presented as number (%).

MF, myelofibrosis; PV, polycythemia vera; ET, essential thrombocythemia; IFN- $\alpha$ , interferon  $\alpha$ .
